# Supplementary material
Source: Frontiers journal article supplement (https://www.frontiersin.org/articles/215587)
Supplement: Image_6.pdf [file Image_6.pdf]

# **α-LINOLENIC ACID METABOLISM**

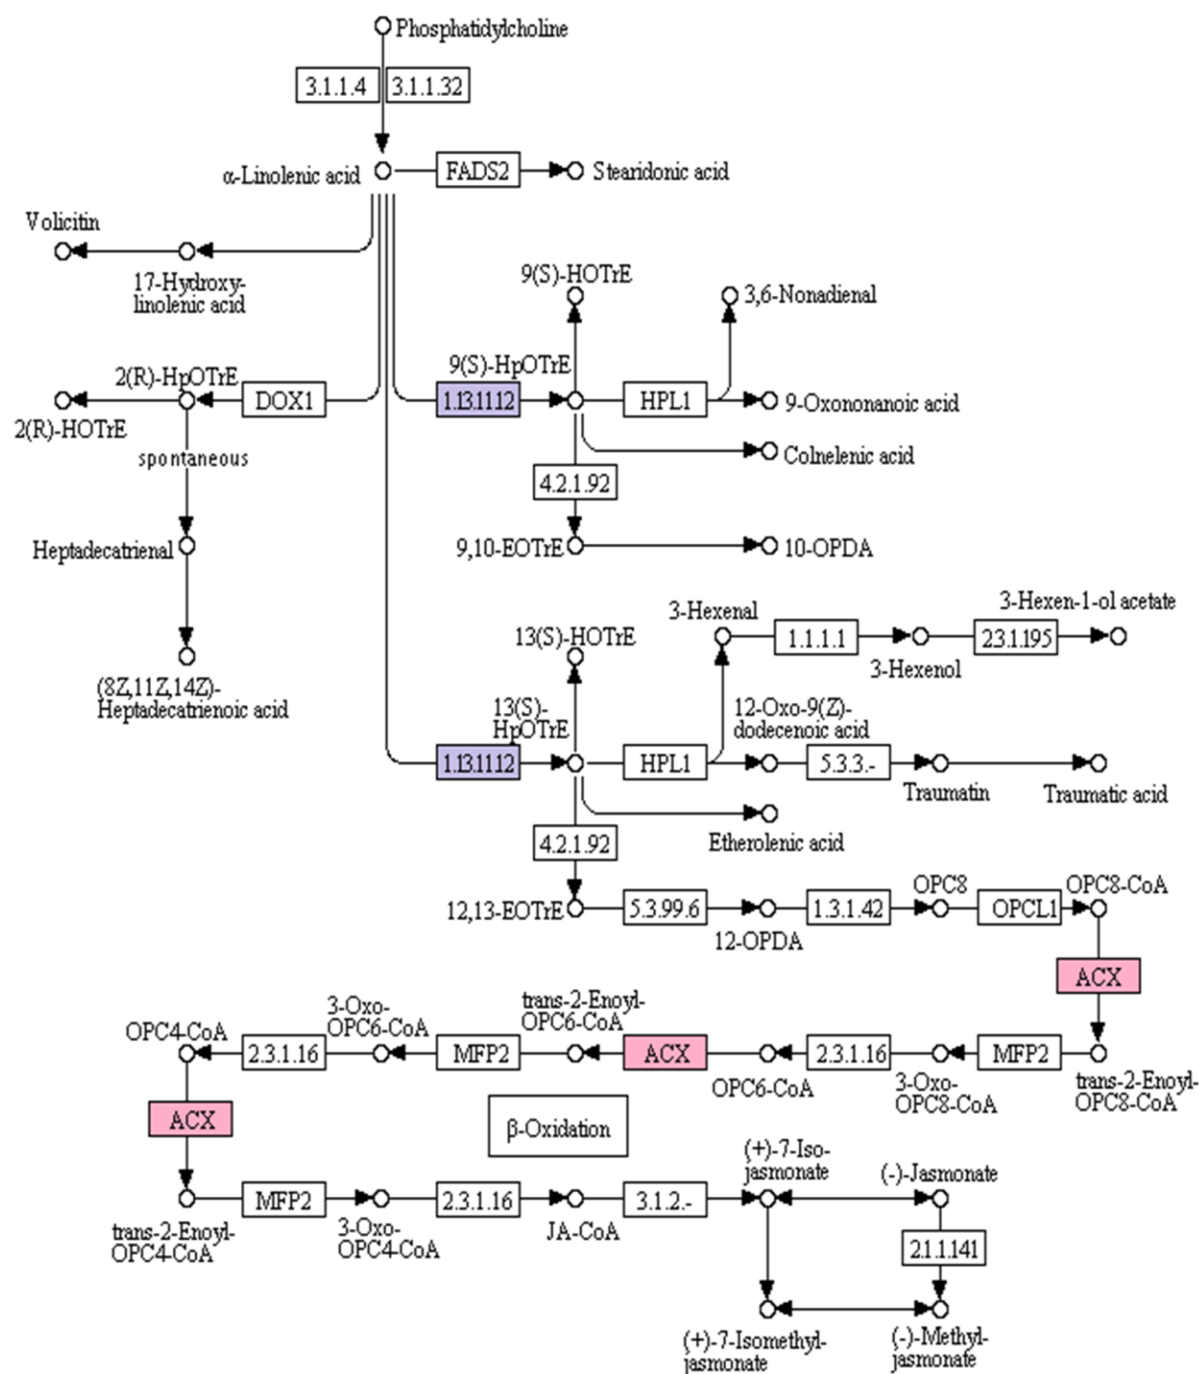

00592 1/6/15  
(c) Kanehisa Laboratories

**Supplementary Figure S6** KEGG pathway annotation analyses of DEGs in *P. minus* leaf. Alpha-Linolenic acid metabolism pathway (map00592) is one of the significant pathways detected after methyl jasmonate elicitation. Colored boxes indicate regulation upon MeJA.
